# Supplementary material
Source: Springer Nature journal article supplement (https://www.springermedizin.de/resource/supplementary/12913_2013_3422_MOESM1_ESM.pdf/9532694)
Supplement: MOESM1 [file 9532694]

**2006**

At least 1 claim with  
a diagnosis of MS<sup>a</sup>  
N=21,112

Continuously eligible  
N=15,399 (72.9%)  
**2006 MS Cohort**

**2011**

At least 1 claim with  
a diagnosis of MS<sup>a</sup>  
N=20,653

Continuously eligible  
N=15,902 (77.0%)  
**2011 MS Cohort**

At least 1 claim for a DMD  
N=8,451 (40.9%)

No claims for fingolimod  
N=8,145 (39.4%)  
**2011 MS DMD Cohort**

DMD monotherapy  
N=7,805 (37.8%)  
**2011 MS DMD Monotherapy Cohort**
